# Supplementary material for: Impact of methoxyacetic acid on mouse Leydig cell gene expression
Source: Reprod Biol Endocrinol. 2010 Jun 18;8:65. doi: 10.1186/1477-7827-8-65 (PMC2909983; doi:10.1186/1477-7827-8-65)
Supplement: Additional file 3 — Gene functional clusters affected by 5 mM MAA for each sub-group as determined using DAVID database, together with the KEGG pathways enriched in each group. [file 1477-7827-8-65-S3.XLS]

## Sheet: File 3A_cluster_summary
Additional file 3A - This file contains the gene functional clusters affected by 5 mM MAA for each sub-group as determined using DAVID database, together with the KEGG pathways enriched in each group, namely, early, mid and late. This summary sheet contains the top three gene functional clusters affected by 5 mM MAA. The top term for each cluster, the cluster enrichment score and the number of ge…
Response	Top term	Enrichment score	Cluster gene count	P-value
Early transient	GO:0045449~regulation of transcription	5.96	106	3.23363e-07
	GO:0044424~intracellular part	5.8	211	1.11497e-06
	GO:0065007~biological regulation	5.54	124	6.15298e-07
Early sustained	GO:0050794~regulation of cellular process	3.41	66	0.000185321
	IPR000867:Insulin-like growth factor-binding protein, IGFBP	3.04	4	0.000627866
	domain:VWFC (Von Willebrand Factor)	2.91	4	0.000480847
Early persistent	GO:0048731~system development	2.19	48	0.0011898
	GO:0048514~blood vessel morphogenesis	2.13	9	0.00217376
	GO:0044421~extracellular region part	2.07	43	0.00646003
Mid transient	GO:0007155~cell adhesion	3.11	34	0.000328462
	GO:0044237~cellular metabolic process	2.25	347	0.000159716
	IPR004021:HIN-200/IF120x	2.13	5	0.000910355
Mid sustained	GO:0044421~extracellular region part	8.22	109	7.29569e-10
	IPR015493:Protocadherin beta	6.56	15	1.68176e-12
	IPR003128:Villin headpiece	4.39	5	2.85232e-05
Late	GO:0044421~extracellular region part	10.34	165	5.60484e-12
	GO:0048856~anatomical structure development	4.4	144	1.10427e-05
	GO:0044449~contractile fiber part	3.47	12	0.000175087

## Sheet: File 3B_early_transient
Additional file 3B - This sheet contains the functional clusters enriched (enrichment score >2) for genes responsive to 5 mM MAA treatment only at 3 hr
Clusters	Enrichment score	Cluster gene count	Top term	Top term P_value	Other terms in the cluster	Genes in the cluster	No. of query genes involved in all of the categories	No. of genes in the specific category out of all categories	No. of genes in all of the categories
1	5.96	106	GO:0045449~regulation of transcription	3.23363e-07	GO:0010468~regulation of gene expression,GO:0006350~transcription,GO:0019219~regulation of nucleobase, nucleoside, nucleotide and nucleic acid metabolic process,GO:0016070~RNA metabolic process,GO:0006355~regulation of transcription, DNA-dependent,GO:0006351~transcription, DNA-dependent,GO:0032774~RNA biosynthetic process,GO:0019222~regulation of metabolic process,GO:0031323~regulation of cellula…	Zfx, Timeless, Klf16, Sox9, Zfp111, Cry2, Atf7ip, Sirt1, Zbtb40, Nr6a1, Asb15, Klf3, Bach2, Mxd1, Arid5b, Zfp503, Baz2a, Htatip2, Hmgb1, Mms19, Wwtr1, Zfp78, Zfp668, EG382421, Zfp653, Ticam1, Ss18l1, Nfkbiz, Bnc1, Terf2ip, Zfp182, Per1, Zfp248, Ctcf, Nfkbie, Creb5, Zfp161, Fosl2, Jmjd1a, Arid3b, 2810426N06Rik, Ing5, Zbtb45, Sp2, AW146020, Pdcd11, Zfy2, Lhx9, Zfp318, Gmeb2, Pogz, Asxl1, T, Per2, T…	276	2320	14977
2	5.8	211	GO:0044424~intracellular part	1.11497e-06	GO:0043231~intracellular membrane-bound organelle,GO:0043227~membrane-bound organelle,GO:0043229~intracellular organelle,GO:0043226~organelle,	Nt5dc3, Errfi1, Atr, Sox9, Vezt, Atf7ip, Sirt1, Klf3, Prickle2, Arid5b, Nek1, Pdpk1, Htatip2, Zfp78, Gtf3c5, Nfkbiz, Zfp182, Fbxl3, March3, Mgst3, Spry2, Fosl2, Rnmt, Klhl24, Tnpo3, Hspa4, Bcl9, Trpc2, Cdc42bpa, Bub3, Gmeb2, Pogz, Asxl1, D330012F22Rik, Pcnt, Per2, Abca5, Stim1, Agk, Zfp509, Ahr, Crkrs, Adc, Numa1, Cyhr1, Tnfaip3, Zfp628, Slc25a29, Acot11, Spry1, Exod1, Ccnl2, 9030611O19Rik, Aldh2…	302	8942	15845
3	5.54	124	GO:0065007~biological regulation	6.15298e-07	GO:0050794~regulation of cellular process,GO:0050789~regulation of biological process,	Zfx, Atr, Taok3, Sox9, Atf7ip, Sirt1, Asb15, Klf3, Arid5b, Baz2a, Ptx3, Htatip2, Bcl2, Zfp78, Ss18l1, Nfkbiz, Bnc1, Terf2ip, Zfp182, Zfp248, Spry2, Zfp161, Tmprss6, Fosl2, Mtm1, Hrbl, F3, Zbtb45, Trpc2, Sphk1, Zfy2, Lhx9, Gmeb2, Pogz, Amigo2, Asxl1, Stc1, Per2, Trp53, Hdx, C330002I19Rik, Stim1, Agk, Zfp509, Pde8b, Ahr, Scx, Ankhd1, Jag1, Il1rl1, Zfp628, Atf1, D0H4S114, Zfp26, Spry1, Grhl1, Rhot1,…	276	4607	14977
4	4.5	178	GO:0044238~primary metabolic process	8.54537e-06	GO:0044237~cellular metabolic process,GO:0043170~macromolecule metabolic process,GO:0008152~metabolic process,	Zfx, Stk36, Atr, Taok3, Sox9, Pigc, Atf7ip, Col11a1, Sirt1, Asb15, Mcm9, Klf3, Camkk1, Setmar, Arid5b, Nek1, Pdpk1, Baz2a, Htatip2, A230051G13Rik, Zfp78, Gtf3c5, Ss18l1, Cpd, Nfkbiz, Bnc1, Rnf19b, Terf2ip, Mettl4, Zfp182, Fbxl3, A030014E15Rik, March3, Pop7, Zfp248, Zfp161, Tmprss6, Fosl2, Mtm1, Rnmt, Sfrs12, 2610207I05Rik, Erc1, Zbtb45, Plk3, Hspa4, Dusp6, Trpc2, Sphk1, Cdc42bpa, Lhx9, Zfy2, Ube2…	276	7204	14977
5	3.93	107	GO:0046872~metal ion binding	8.93401e-05	GO:0043169~cation binding,GO:0043167~ion binding,	Zfx, Stk36, 8430427H17Rik, Atr, Taok3, Zfyve26, Zc3h4, Sirt1, Zdhhc6, Asb15, Klf3, Prickle2, Setmar, Zswim6, Nek1, Baz2a, Sfxn2, Zfp78, Pdxp, Cpd, Rnf19b, Bnc1, Zfp182, March3, Zfp248, Zfp161, Zfp750, Itgav, Hrbl, 2610207I05Rik, Zbtb45, Trpc2, Sphk1, Cdc42bpa, Zfy2, Lhx9, Zfp236, Zfp644, Pogz, Asxl1, Caps2, Trp53, Stim1, Zfp509, Jag1, Ppat, Cyhr1, Tnfaip3, Zfp628, Zfp26, Exod1, Rhot1, Lims1, Klf1…	327	3826	16377
6	2.79	10	zinc finger region:C2H2-type 3	0.000850753	zinc finger region:C2H2-type 5,zinc finger region:C2H2-type 6,zinc finger region:C2H2-type 2,zinc finger region:C2H2-type 7,zinc finger region:C2H2-type 4,zinc finger region:C2H2-type 1,	Zfx, Zfp161, Egr1, Zfy2, Bnc1, Zfp509, Pogz, Klf3, Ctcf, Zfp26,	191	125	9547
7	2.02	10	IPR013069:BTB/POZ	0.00481642	IPR000210:BTB/POZ-like,IPR011333:BTB/POZ fold,SM00225:BTB,	Zfp161, Rhobtb2, Zfp509, Zbtb40, Btbd14a, Klhl15, Bach2, Zbtb45, Armc5, Kcnv2,	326	108	16924
8	2.01	6	zinc finger region:C2H2-type 7	0.00253424	zinc finger region:C2H2-type 9,zinc finger region:C2H2-type 8,zinc finger region:C2H2-type 10,	Zfx, Zfy2, Zfp509, Pogz, Ctcf, Zfp26,	191	48	9547
9	2	47	GO:0043412~biopolymer modification	0.00539898	GO:0043687~post-translational protein modification,GO:0006464~protein modification process,	Dusp6, Stk36, Cdc42bpa, Atr, Taok3, Ptpn1, Ube2o, Bmp2k, Cry2, Atf7ip, Pigc, Sirt1, Asb15, Camkk1, Stc1, Trp53, Nek1, Pdpk1, Tec, Stambpl1, Htatip2, Agk, Smad5, Crkrs, Rnf144b, Mtmr10, Zdhhc2, Ppm2c, Dusp4, Trim63, Il1rl1, Tnfaip3, Cyhr1, Rnf19b, Uba6, Fbxl3, March3, Ctcf, Ppm1k, Camk2d, Bmp4, Hectd2, Mtm1, Mknk1, 2610207I05Rik, Erc1, Plk3,	276	1717	14977

## Sheet: File 3C_early_sustained
Additional file 3C - This sheet contains the functional clusters enriched (enrichment score >2) for genes responsive to 5 mM MAA treatment at both 3 hr and 24 hr, but not 24hr.
Clusters	Enrichment score	Cluster gene count	Top term	Top term P_value	Other terms in the cluster	Genes in the cluster	No. of query genes involved in all of the categories	No. of genes in the specific category out of all categories	No. of genes in all of the categories
1	3.41	66	GO:0050794~regulation of cellular process	0.000185321	GO:0050789~regulation of biological process,GO:0065007~biological regulation,	Hivep3, Fzd1, Hexim2, Rasgef1b, Kitl, Taok3, Mafk, Notch1, Il12a, Tlr7, Tigd5, Foxj1, Wisp1, Rassf5, Rabl3, Bcl2, EG434179, Cln8, Igfbp5, Zfp710, Rnd1, Bnc2, Mybl1, Dlx1, Ccng2, Zbtb46, Arid5a, Serpinb9, Zbtb1, Garnl3, Rasgrp3, Rgs16, Prkcbp1, Tlr3, Tnfsf11, Crtap, Htra3, Clcf1, Fgd6, Nsd1, Cyr61, Socs2, Hbp1, Parp14, Epc2, Zbtb8, Cxcl1, Nr4a1, Tbx6, Arntl, Clec2d, Tsc22d2, Maf, Ankrd42, Nuak2, U…	156	3816	14977
2	3.04	4	IPR000867:Insulin-like growth factor-binding protein, IGFBP	0.000627866	domain:IGFBP N-terminal,GO:0005520~insulin-like growth factor binding,SM00121:IB,GO:0019838~growth factor binding,	Htra3, Igfbp5, Cyr61, Wisp1,	184	16	16924
3	2.91	4	domain:VWFC	0.000480847	IPR001007:von Willebrand factor, type C,SM00214:VWC,	Thbs1, Col3a1, Cyr61, Wisp1,	110	14	9547
4	2.72	9	GO:0008361~regulation of cell size	0.00312391	GO:0001558~regulation of cell growth,GO:0016049~cell growth,GO:0040007~growth,GO:0040008~regulation of growth,	Cln8, Htra3, Igfbp5, Cyr61, Socs2, Epc1, Wisp1, Hbegf, Notch1,	156	138	14977
5	2.67	4	domain:TSP type-1	0.00441285	IPR000884:Thrombospondin, type I,SM00209:TSP1,	Spon2, Cyr61, Wisp1, Thbs1,	110	9	9547
6	2.64	8	GO:0005125~cytokine activity	0.0105153	cytokine,mmu04060:Cytokine-cytokine receptor interaction,	Clcf1, Kitl, Socs2, Cxcl5, Tnfsf11, Cxcl1, Cx3cl1, Il12a,	171	231	16377
7	2.57	9	GO:0005525~GTP binding	0.0242267	GO:0032561~guanyl ribonucleotide binding,GO:0019001~guanyl nucleotide binding,GTP-binding,	Tubb6, Tgtp, Rnd1, Gbp1, Rab40b, Gbp2, Rhobtb1, Rabl3, Gbp3,	171	336	16377
8	2.4	13	GO:0043066~negative regulation of apoptosis	0.00353046	GO:0043069~negative regulation of programmed cell death,GO:0042981~regulation of apoptosis,GO:0006915~apoptosis,GO:0043067~regulation of programmed cell death,GO:0012501~programmed cell death,GO:0008219~cell death,GO:0016265~death,	Cln8, Clcf1, Nuak2, Kitl, Dlx1, Notch1, Bcl2, Serpinb9, Clec2d, Nr4a1, Fastkd2, Rassf5, Elmo1,	156	189	14977

## Sheet: File 3D_early_persistant
Additional file 3D - This sheet contains the functional clusters enriched (enrichment score >2) for genes responsive to 5 mM MAA treatment at all three time points.
Clusters	Enrichment score	Cluster gene count	Top term	Top term P_value	Other terms in the cluster	Genes in the cluster	No. of query genes involved in all of the categories	No. of genes in the specific category out of all categories	No. of genes in all of the categories
1	2.19	48	GO:0048731~system development	0.0011898	GO:0048513~organ development,GO:0007275~multicellular organismal development,GO:0048856~anatomical structure development,GO:0032502~developmental process,	PCYT1B, CTGF, PPP3CB, ANGPT2, PEG10, NSD1, COL11A1, FOS, NR2F2, EGR2, PPIA, DYRK3, SRGN, CD1D1, PKP2, ENG, CXCL12, HEY1, ERBB3, PHLDA2, HOXD4, DHH, RND1, ZFP91, HES7, EFHD1, PLCD1, SERPINE1, KLF5, SEMA4G, MAPT, EPC1, PBX4, VPREB1, IL7R, GAB3, NDRG4, DACT1, SIX5, CYP26B1, BIRC3, PMAIP1, EAF2, CYCT, DIDO1, TRAF3IP2, DEDD2, D830050J10RIK,	178	1749	14977
2	2.13	9	GO:0048514~blood vessel morphogenesis	0.00217376	GO:0001568~blood vessel development,GO:0001944~vasculature development,GO:0001525~angiogenesis,GO:0048646~anatomical structure formation,	NR2F2, PLCD1, CTGF, ANGPT2, SERPINE1, KLF5, ENG, CXCL12, HEY1,	178	194	14977
3	2.07	43	GO:0044421~extracellular region part	0.00646003	GO:0005615~extracellular space,GO:0005576~extracellular region,	CCL17, TMEM8, CTGF, HP, ENTPD2, CSF1R, ANGPT2, SERPIND1, THSD1, 1300007F04RIK, CXCL10, COL11A1, MRPL3, SHBG, FMO3, PCDHB15, MATN3, OMD, KIFC2, CMTM3, AREG, SRGN, PRSS16, CLDN9, TMEM25, ENG, APOF, CXCL12, TSLP, AQP1, DHH, PRTN3, PAG1, CHST1, ZFP91, NXPH3, SERPINE1, SEMA4G, VPREB1, MCAM, CSF2RA, LY96, TRIM36,	202	2195	15845

## Sheet: File 3E_mid_transient
Additional file 3E -This sheet contains the functional clusters enriched (enrichment score >2) for genes responsive to 5 mM MAA treatment only at 8 hr.
Clusters	Enrichment score	Cluster gene count	Top term	Top term P_value	Other terms in the cluster	Genes in the cluster	No. of query genes involved in all of the categories	No. of genes in the specific category out of all categories	No. of genes in all of the categories
1	3.11	34	GO:0007155~cell adhesion	0.000328462	GO:0022610~biological adhesion,cell adhesion,	Thbs1, Kitl, Tsc1, Col6a2, Arhgap6, Tek, Col1a2, T, Lyve1, Zeb2, Pcdhb22, Itga7, Itgb2, Cd44, Tnfaip6, Adam23, Pik3cb, Egfl6, Amica1, Col17a1, Col3a1, Icam1, Pcdhb4, Lama2, Nrxn1, Pstpip1, Pcdhga1, Abl1, Bcl2l11, Efr3a, Pcdh12, Adam5, Vcan, Col2a1,	385	679	14977
2	2.25	347	GO:0044237~cellular metabolic process	0.000159716	GO:0044238~primary metabolic process,GO:0008152~metabolic process,GO:0043283~biopolymer metabolic process,GO:0009987~cellular process,GO:0043170~macromolecule metabolic process,GO:0006139~nucleobase, nucleoside, nucleotide and nucleic acid metabolic process,	Pcyt1b, Frk, Gls, Adra1b, Fbxl16, Nanos1, Drd4, Fes, Zmynd11, Pick1, Zeb2, Ptbp2, Hpdl, Dok7, Cdc6, Thoc1, Hgf, Cux1, Sat2, Opn3, Zbtb1, Hic1, Dyrk4, Trim67, Insig1, Lrp2, Pak7, Trerf1, L3mbtl3, Batf3, Adcy4, Trpc2, Ndnl2, Sox17, Pftk1, Pak3, Tsc22d1, Stc1, Dusp12, Mrpl15, Epha1, 1110014J01Rik, Habp4, Il1rl1, Esr1, Mmab, 1700027L20Rik, Bmi1, Tmem38b, Cd1d2, Lbxcor1, Il6, Fbxo28, March2, Adam5, Zb…	385	7205	14977
3	2.13	5	IPR004021:HIN-200/IF120x	0.000910355	domain:DAPIN,IPR004020:Pyrin,	Ifi205, Ifi202b, Ifi203, Ifi204, AI607873,	445	8	16924

## Sheet: File 3F_mid_sustained
Additional file 3F -This sheet contains the functional clusters enriched (enrichment score >2) for genes responsive to 5 mM MAA treatment at 8 hr and at 24hr.
Clusters	Enrichment score	Cluster gene count	Top term	Top term P_value	Other terms in the cluster	Genes in the cluster	No. of query genes involved in all of the categories	No. of genes in the specific category out of all categories	No. of genes in all of the categories
1	8.22	109	GO:0044421~extracellular region part	7.29569e-10	GO:0005576~extracellular region,GO:0005615~extracellular space,	Csf1r, Muc2, Ramp3, Nppb, Acp5, 1700001G17Rik, Pcdhb18, Cadm4, F2, Igfbp1, Spn, C1qtnf1, Rspo1, Jam2, Slc39a8, Clec11a, Nrtn, Ramp2, Cck, Cyp1a1, Sema3a, Fras1, Cdh15, Mmp17, Sgca, 2300002D11Rik, Vwf, Stc1, Adam12, Inhba, Wnt6, Wnt10a, Aoc3, Abcb9, Ctf1, Crlf1, Pcdhb9, Dnase2a, Mmp23, Il1rl1, Ror1, Ogn, Slpi, Mrc1, Lepr, Lyzl4, Pcdhb7, 9030425E11Rik, Upk2, Il15, C2, Sema7a, Orm2, Fut7, Mansc1, Fg…	413	2195	15845
2	6.56	15	IPR015493:Protocadherin beta	1.68176e-12	IPR013164:Cadherin, N-terminal,GO:0007156~homophilic cell adhesion,IPR002126:Cadherin,SM00112:CA,	Pcdhb14, Pcdhb6, Pcdhb7, Pcdhb17, Pcdhb18, Pcdhb8, Pcdhb5, Pcdhb11, Pcdhb16, Pcdhb19, Pcdhb9, Pcdhb20, Cdh26, Cdh15, Cspg4,	439	22	16924
3	4.39	5	IPR003128:Villin headpiece	2.85232e-05	SM00153:VHP,domain:HP,	Ablim2, Ablim3, Vil1, Vill, Epb4.9,	439	8	16924
4	3.72	107	GO:0051179~localization	3.06715e-05	GO:0006810~transport,GO:0051234~establishment of localization,	9830134C10Rik, Muc2, Ramp3, Hap1, Apol7c, Epb4.1l4b, Cyp4f39, 1190003J15Rik, Rnf157, Ifi204, Syngr1, Mfap3l, Apol8, C1qtnf1, Abcd2, Slc39a8, Nrtn, Ramp2, Slc16a10, Nos1, Alox12, Cd74, Cck, Selenbp1, Sema3a, Lrp2, Spire1, Slc13a4, Atcay, Hba-a1, Rhd, Abca5, Grip1, Abcb9, Rab3d, Asgr1, Mmp23, Sorbs1, Tcte3, Esr2, Kcnab2, Mrc1, Pacsin1, Slc3a1, Slc26a4, Slco2a1, Orm2, Sytl2, Col11a2, Cetn4, Rab3b, B…	367	3021	14977
5	2.77	9	GO:0046942~carboxylic acid transport	0.000268442	GO:0015849~organic acid transport,GO:0046943~carboxylic acid transmembrane transporter activity,GO:0005342~organic acid transmembrane transporter activity,	Slc25a12, Slc1a6, Slc43a2, Slc3a1, Hnf1a, Slc7a4, Slco2a1, Slc38a3, Slc36a2,	367	69	14977
6	2.71	13	GO:0050863~regulation of T cell activation	0.000105016	GO:0050870~positive regulation of T cell activation,GO:0051251~positive regulation of lymphocyte activation,GO:0051249~regulation of lymphocyte activation,GO:0050865~regulation of cell activation,GO:0042110~T cell activation,GO:0001775~cell activation,GO:0046649~lymphocyte activation,GO:0045321~leukocyte activation,	Cd74, H2-DMa, Itgal, Il7, Il15, Spn, H2-Oa, Cd52, Bmi1, Thy1, Rorc, Vwf, F2,	367	77	14977
7	2.28	89	GO:0048856~anatomical structure development	0.000901759	GO:0048731~system development,GO:0007275~multicellular organismal development,GO:0032502~developmental process,	Mlf1, Oas1d, Rb1, Lta, Nppb, Foxa3, Mreg, Nr2f2, Erap1, H2-DMa, Add2, Igfbp1, Myl9, Spn, Tgfa, Hnf1a, Cobl, Ifi204, Lox, Rhob, Nrtn, H2-Oa, Mmp14, Tbxa2r, Klf1, Cd74, Alox12, Vcl, Cck, Klf5, Stra8, Mapt, Ninj2, Sema3a, Lrp2, Fras1, Arhgap22, Otor, Sema4a, Figf, Crb3, Tnni1, Thy1, Igfbp3, Vwf, Inhba, Wnt6, Itga6, Nanog, Wnt10a, Ctf1, Erbb3, Phlda2, Dnase2a, Bai2, Etl4, Pcdhb16, Lyn, Il7, Cspg4, Tc…	367	2058	14977
8	2.15	15	GO:0048534~hemopoietic or lymphoid organ development	0.00549269	GO:0030097~hemopoiesis,GO:0002520~immune system development,	Mlf1, Dnase2a, Lta, Rb1, Lyn, Il7, H2-Oa, Bmi1, Klf1, Rorc, Cd74, H2-DMa, Add2, Il15, Spn,	367	264	14977
9	2.06	9	GO:0030217~T cell differentiation	0.00144325	GO:0030098~lymphocyte differentiation,GO:0002521~leukocyte differentiation,	Rorc, Cd74, H2-DMa, Il7, Il15, Spn, H2-Oa, Bmi1, Rb1,	367	69	14977

## Sheet: File 3G_late
Additional file 3G -This sheet contains the functional clusters enriched (enrichment score >2) for genes responsive to 5 mM MAA treatment only at 24hr.
Clusters	Enrichment score	Cluster gene count	Top term	Top term P_value	Other terms in the cluster	Genes in the cluster	No. of query genes involved in all of the categories	No. of genes in the specific category out of all categories	No. of genes in all of the categories
1	10.34	165	GO:0044421~extracellular region part	5.60484e-12	GO:0005576~extracellular region,GO:0005615~extracellular space,	Acvrl1, C1qtnf3, Bcan, Wif1, Tcn2, Srpx, Fgf2, Klk6, Angptl4, Cyp2f2, Col11a1, Col1a2, Pdzk1ip1, Dlk1, Cml5, Lgals3, Pcdh15, Sfrp4, Hpse, Fstl1, F2r, Apoc1, Clec5a, Tnxb, Sorcs2, Apod, Ly6i, Vtn, Sgcd, Ecm2, Gpr56, Chrnb2, Pi16, Pcdhb10, Spp1, Lama3, Gpha2, Lefty1, Fmo2, Prss35, Pcdhb12, Cyp4f15, Olfm1, Prg4, Mmp9, Ren2, Tac2, Gjc2, Ngfr, Vwf, Lamb3, Dpt, Pcdhb13, Rarres2, Loxl4, Edn2, Col14a1, W…	659	2195	15845
2	4.4	144	GO:0048856~anatomical structure development	1.10427e-05	GO:0007275~multicellular organismal development,GO:0048731~system development,	Cables1, Acvrl1, Rb1, Mtap2, Fgf2, Klk6, Angptl4, Col11a1, Sirt1, Cml5, Pcdh15, Lgals3, Taok2, Gli1, Hoxd3, Rtn4rl1, Dpysl5, Igsf10, Tpd52, Fgd3, Dtx1, Crygs, Neurl, Ndrg2, Krtdap, Chrnb2, Alox12, Insl3, Spp1, Ccnb1ip1, Lefty1, Ift172, Lrp2, Prkar1b, Aspm, Mmp9, Uchl1, Insc, Tnfrsf11a, Ren2, Eraf, Sumf1, Tnnt2, Krt8, Fblim1, Ngfr, Vwf, Cadm1, Ivl, Fbxw4, Ppl, Edn2, Wnt7a, Papss2, Hsf4, Igf2, Post…	621	2058	14977
3	3.47	12	GO:0044449~contractile fiber part	0.000175087	GO:0030016~myofibril,GO:0043292~contractile fiber,GO:0030017~sarcomere,	Synpo2, Csrp3, Sync, Myoz2, Des, Tnnt3, Vcl, Myh3, Ttn, Tnnt2, Krt8, Tnni1,	659	72	15845
4	3.26	25	egf-like domain	4.56617e-05	IPR006210:EGF,IPR000742:EGF-like, type 3,SM00181:EGF,	Crtac1, Megf10, C1r, Bcan, Wif1, Masp2, Adam11, Adam8, Vwce, Emr1, Tnc, Muc4, Cspg5, Odz4, Dlk1, Comp, Nell2, Dll3, Plau, Impg2, Agrn, Btc, Egfl7, Tnxb, Lrp2,	698	213	16241
5	2.98	9	GO:0032963~collagen metabolic process	0.000156417	GO:0044268~multicellular organismal protein metabolic process,GO:0030574~collagen catabolic process,GO:0044266~multicellular organismal macromolecule catabolic process,GO:0044254~multicellular organismal protein catabolic process,GO:0044256~protein digestion,GO:0044259~multicellular organismal macromolecule metabolic process,GO:0044243~multicellular organismal catabolic process,GO:0044236~multice…	Mmp13, Mmp9, Adamts2, Mmp19, Klk6, Mmp3, Tnxb, Kcnma1, Mogat2,	621	21	14977
6	2.78	23	GO:0001775~cell activation	0.000727905	GO:0045321~leukocyte activation,GO:0046649~lymphocyte activation,	Cd8a, Klre1, Tpd52, Klrk1, Fgg, Hdac9, Cd8b1, Inpp5d, Bad, Tnfrsf14, Il7, Cplx2, Clec2i, Vwf, Nlrc3, Chrnb2, Itgam, Spp1, Igh-6, Tlr1, Cd3g, Impdh1, H2-Aa,	621	250	14977
7	2.74	16	monooxygenase	0.00066062	GO:0004497~monooxygenase activity,GO:0016705~oxidoreductase activity, acting on paired donors, with incorporation or reduction of molecular oxygen,	Cyp4b1, Fmo5, Cyp2d12, Cyp2d22, Cyp2b9, Tph1, Fmo4, Cyp2f2, Fmo1, Cyp11a1, Cyp4f14, Fmo2, Cyp4f15, Cyp2c44, Nos1, Egln3,	698	107	16241
8	2.54	14	GO:0046849~bone remodeling	0.00121441	GO:0048771~tissue remodeling,GO:0001503~ossification,GO:0031214~biomineral formation,	Igsf10, Ostn, Enpp1, Tnfrsf11a, Ptger4, P2rx7, Inpp5d, Il7, Sumf1, Fgf23, Mmp13, Spp1, Calca, Il23a,	621	104	14977
9	2.52	16	GO:0002253~activation of immune response	0.000667045	GO:0051240~positive regulation of multicellular organismal process,GO:0050778~positive regulation of immune response,GO:0050776~regulation of immune response,GO:0002684~positive regulation of immune system process,GO:0002682~regulation of immune system process,	Clec2i, Trat1, Klre1, Klrk1, C1r, Cd59b, Igh-6, Masp2, Elf1, Cfi, C3ar1, Cfd, P2rx7, Calca, Edn2, Inpp5d,	621	84	14977
10	2.45	16	microsome	0.00316422	GO:0005792~microsome,GO:0042598~vesicular fraction,	Fmo5, Cyp4b1, Acsl6, Acsl5, Cyp4f14, Cyp2b9, Fmo2, Fmo4, Acsl4, Cyp2f2, Gulo, Fmo1, Jph4, Cyp2d22, Dtna, Cyp4f15,	698	98	16241
11	2.23	24	GO:0048878~chemical homeostasis	0.0026151	GO:0050801~ion homeostasis,GO:0006873~cellular ion homeostasis,GO:0055082~cellular chemical homeostasis,GO:0019725~cellular homeostasis,	Fabp4, Chrna1, Csrp3, Mt2, Gckr, Bad, Atp1a3, Slc4a4, C3ar1, Ryr3, Fgf23, Alox12, Ryr1, Chrnb2, Slc9a9, Ltf, Kcnma1, Mt4, Kcnmb4, Calca, Tesc, Mogat1, Abca4, Txndc15,	621	242	14977
12	2.17	6	domain:Hemopexin-like 2	0.00333366	domain:Hemopexin-like 1,IPR000585:Hemopexin,SM00120:HX,domain:Hemopexin-like 4,domain:Hemopexin-like 3,	Prg4, Mmp13, Mmp9, Mmp19, Vtn, Mmp3,	483	21	9547
13	2.09	4	domain:SMB 2	0.00737591	domain:SMB 1,IPR001212:Somatomedin B,SM00201:SO,	Prg4, Enpp1, Enpp2, Vtn,	483	3	9547
14	2	17	GO:0048503~GPI anchor binding	0.00178073	gpi-anchor,GO:0005543~phospholipid binding,GO:0035091~phosphoinositide binding,	Ly6f, Cd59b, Lynx1, Cd109, Ly6i, Bst1, Ly6c1, Negr1, Ncam1, Vnn1, Mmp19, Bst2, Ly6a, Rtn4rl1, Anxa13, Plekha1, Anxa6,	686	122	16377

## Sheet: File 3H_kegg
Additional file 3H -This sheet contains the KEGG pathways enriched for early, mid and late gene sets respectively. Classification is based on 5 mM MAA responsive genes.
	Term	Count	%	PValue	Genes	No. of query genes involved in all of the KEGG pathways	No. of genes in the specific KEGG pathway	No. of genes in all of KEGG pathways	Fold Enrichment
Early	mmu04060:Cytokine-cytokine receptor interaction	20	0.0198	0.00887558	Ccl17, Clcf1, Csf1r, Kitl, Il1rap, Il4ra, Zfp91, Cxcl10, Cxcl1, Cx3cl1, Il12a, Cxcl5, Eda2r, Cxcl12, Tnfrsf13c, Tslp, Ccr7, Csf2ra, Il7r, Tnfsf11,	180	242	4079	1.87282
	mmu04710:Circadian rhythm	4	0.004	0.0171657	Per2, Arntl, Cry2, Per1,	180	13	4079	6.97265
	mmu04020:Calcium signaling pathway	14	0.0138	0.0404307	Plcd3, Ppp3cb, Sphk1, Itpka, P2rx5, Atp2b1, Camk2d, Plcd1, Ptgfr, Ryr1, Phka1, Erbb3, Gnal, Adcy9,	180	174	4079	1.82331
	mmu04640:Hematopoietic cell lineage	8	0.0079	0.0667084	Itga6, Csf1r, Kitl, Cd1d1, Il4ra, Csf2ra, Il7r, Itga4,	180	82	4079	2.21084
	mmu04630:Jak-STAT signaling pathway	12	0.0119	0.0684504	Spry1, Clcf1, Socs2, Il4ra, Tslp, Csf2ra, Zfp91, Pias3, Il7r, Il12a, Pik3r5, Spry2,	180	152	4079	1.78904
	mmu04620:Toll-like receptor signaling pathway	9	0.0089	0.0774408	Tlr7, Ticam1, Cxcl10, Tlr3, Fos, Map2k7, Ly96, Il12a, Pik3r5,	180	102	4079	1.99951
	mmu04010:MAPK signaling pathway	17	0.0168	0.0841746	Dusp6, Fgf21, Ppp3cb, Dusp4, Fgf11, Taok3, Gadd45b, Rasgrp2, Fos, Nr4a1, Dusp14, Trp53, Rasgrp3, Mapt, Mknk1, Map2k7, Nfatc4,	180	252	4079	1.52873
Mid	mmu01430:Cell Communication	14	0.0123	0.0490986	Thbs1, Col17a1, Col3a1, Col11a2, Col6a2, Nes, Lama2, Col1a2, Gjb5, Vwf, Itga6, Krt76, Krt23, Col2a1,	246	131	4079	1.77205
	mmu05211:Renal cell carcinoma	9	0.0079	0.0491538	Pik3cb, Hgf, Tgfb2, Sos1, Figf, Tgfa, Pak7, Jun, Pak3,	246	68	4079	2.19458
	mmu04640:Hematopoietic cell lineage	11	0.0097	0.0237402	Cd1d2, Il1r2, Itga6, Csf1r, Cd59b, Kitl, Il6, Cd14, Il7, Cd44, Cd7,	246	82	4079	2.22432
	mmu00980:Metabolism of xenobiotics by cytochrome P450	9	0.0079	0.0528442	Ugt1a10, Gsta1, Cyp1a1, Gsta3, Cyp3a13, Adh4, Mgst1, Cyp2s1, Aldh3a1,	246	69	4079	2.16278
	mmu00410:beta-Alanine metabolism	5	0.0044	0.0456076	Abat, Ehhadh, Upb1, Aoc3, Aldh2,	246	23	4079	3.60463
	mmu04060:Cytokine-cytokine receptor interaction	23	0.0202	0.0314138	Il18rap, Hgf, Csf1r, Ccl2, Tgfb2, Kitl, Lta, Il7, Ghr, Ltb, Ccl11, Lepr, Il1r2, Inhba, Ccl8, Flt1, Il6, Ctf1, Cxcl12, Ppbp, Il15, Lifr, Fas,	246	242	4079	1.57591
	mmu00632:Benzoate degradation via CoA ligation	5	0.0044	0.0836775	Fn3k, Ehhadh, Dhrs3, Acyp2, Pnpla3,	246	28	4079	2.96095
	mmu04512:ECM-receptor interaction	11	0.0097	0.0276002	Vwf, Thbs1, Itga6, Itga7, Col3a1, Col11a2, Col6a2, Lama2, Cd44, Col1a2, Col2a1,	246	84	4079	2.17136
	mmu04510:Focal adhesion	20	0.0176	0.0202201	Pik3cb, Thbs1, Hgf, Mylk2, Sos1, Col3a1, Col11a2, Figf, Col6a2, Lama2, Col1a2, Pak3, Vwf, Itga6, Flt1, Vcl, Itga7, Pak7, Jun, Col2a1,	246	192	4079	1.72722
	mmu04360:Axon guidance	14	0.0123	0.037609	Epha1, Ablim3, Sema4a, Fes, Pak3, Ablim2, Abl1, Plxna4, Cxcl12, Sema6a, Limk1, Sema3a, Pak7, Sema7a,	246	126	4079	1.84237
Late	mmu01430:Cell Communication	17	0.0179	0.00101949	Itgb4, Gjc2, Vtn, Tnc, Col11a1, Col1a2, Krt8, Comp, Lamb3, Vwf, Des, Itga6, Spp1, Lamc2, Lama3, Col4a4, Tnxb,	212	131	4079	2.49687
	mmu00590:Arachidonic acid metabolism	8	0.0084	0.072309	Gpx1, Alox12, Cyp4f14, Cyp2b9, Cyp4f15, Alox12e, Cyp2c44, Dhrs4,	212	71	4079	2.16795
	mmu04640:Hematopoietic cell lineage	12	0.0126	0.00298207	Cd34, Cd8a, H2-Eb1, Itga1, Itga6, Itgam, Cd59b, Cd8b1, Itgb3, Il7, Fcer2a, Cd3g,	212	82	4079	2.81569
	mmu04612:Antigen processing and presentation	9	0.0095	0.0966278	Cd8a, H2-Eb1, Cd8b1, H2-Q10, H2-DMb2, H2-D1, H2-Ab1, Ctsb, H2-Aa,	212	91	4079	1.90291
	mmu04610:Complement and coagulation cascades	12	0.0126	0.000795763	Vwf, Fgg, C1r, Cd59b, F5, Cd46, Plau, F2r, Masp2, Cfi, C3ar1, Cfd,	212	70	4079	3.29838
	mmu04514:Cell adhesion molecules (CAMs)	17	0.0179	0.00342826	Cd8a, H2-Eb1, Cd8b1, Pvrl1, H2-D1, H2-Ab1, Cldn1, Negr1, Cd34, Ncam1, Itgam, Itga6, H2-Q10, H2-DMb2, Cadm1, Itgb7, H2-Aa,	212	147	4079	2.2251
	mmu04512:ECM-receptor interaction	18	0.0189	8.34884e-07	Itga1, Itgb4, Itgb3, Vtn, Tnc, Col11a1, Col1a2, Lamb3, Vwf, Fndc5, Itga6, Spp1, Lamc2, Lama3, Agrn, Col4a4, Itgb7, Tnxb,	212	84	4079	4.12298
	mmu04510:Focal adhesion	25	0.0263	3.79421e-05	Shc3, Mylk, Itgb4, Itgb3, Col11a1, Col1a2, Vwf, Lamb3, Itga6, Itgb7, Tnxb, Itga1, Rac2, Bad, Mylpf, Vtn, Tnc, Comp, Flt1, Spp1, Vcl, Cav2, Lamc2, Lama3, Col4a4,	212	192	4079	2.50528
	mmu00051:Fructose and mannose metabolism	6	0.0063	0.0805726	Aldob, Pmm1, Gmds, Akr1b3, Pfkp, Sord,	212	45	4079	2.56541
	mmu02010:ABC transporters - General	7	0.0074	0.0175802	Abca8a, Abcd2, Abca7, Abca4, Abcg5, Abcc8, Abca8b,	212	41	4079	3.28497
