# Supplementary material for: Impact of methoxyacetic acid on mouse Leydig cell gene expression
Source: Reprod Biol Endocrinol. 2010 Jun 18;8:65. doi: 10.1186/1477-7827-8-65 (PMC2909983; doi:10.1186/1477-7827-8-65)
Supplement: Additional file 9 — Gene functional clusters and KEGG pathways enriched in each group of 1 mM and 5 mM MAA common response genes. [file 1477-7827-8-65-S9.XLS]

## Sheet: File 9A_kegg
Additional file 9A - This sheet contains the KEGG pathways enriched for early, mid and late gene sets respectively.
	Classification is based on overlap between genes responding to 1 mM and 5 mM MAA treatment.
	Term	Pathway gene count	%	PValue	Genes	No. of query genes found in all KEGG pathways	No. of genes in the specific KEGG pathway	No. of genes in all KEGG pathways	Fold Enrichment
Early	mmu04020:Calcium signaling pathway	8	0.0214	0.0283729	Plcd1, Ptgfr, Plcd3, Sphk1, Itpka, Atp2b1, Erbb3, Camk2d,	71	174	4079	2.64141
	mmu04060:Cytokine-cytokine receptor interaction	9	0.0241	0.0534384	Ccl17, Tnfrsf13c, Il4ra, Tslp, Ccr7, Cxcl10, Tnfsf11, Il7r, Cx3cl1,	71	242	4079	2.1366
Mid	mmu04514:Cell adhesion molecules (CAMs)	9	0.0291	0.00122672	Cdh15, H2-DMa, Itgal, Jam2, H2-Bl, Spn, H2-Ab1, H2-Oa, Vcan,	61	147	4079	4.09401
	mmu04612:Antigen processing and presentation	5	0.0162	0.0438005	Cd74, H2-DMa, H2-Bl, H2-Ab1, H2-Oa,	61	91	4079	3.67411
	mmu00410:beta-Alanine metabolism	3	0.0097	0.0441689	Abat, Aoc3, Upb1,	61	23	4079	8.72202
	mmu04940:Type I diabetes mellitus	4	0.0129	0.0573364	H2-DMa, H2-Bl, H2-Ab1, H2-Oa,	61	60	4079	4.45792
	mmu00330:Arginine and proline metabolism	3	0.0097	0.0840159	Nos1, Arg1, Ckb,	61	33	4079	6.07899
Late	mmu04512:ECM-receptor interaction	7	0.0266	0.00143059	Fndc5, Spp1, Lama3, Itgb3, Agrn, Vtn, Tnxb,	62	84	4079	5.48253
	mmu04514:Cell adhesion molecules (CAMs)	8	0.0304	0.0058404	Cd34, H2-Eb1, H2-Q10, Pvrl1, H2-DMb2, H2-D1, H2-Ab1, Cldn1,	62	147	4079	3.58043
	mmu04612:Antigen processing and presentation	6	0.0228	0.0110137	H2-Eb1, H2-Q10, H2-DMb2, H2-D1, H2-Ab1, Ctsb,	62	91	4079	4.33782
	mmu04940:Type I diabetes mellitus	5	0.019	0.011826	H2-Eb1, H2-Q10, H2-DMb2, H2-D1, H2-Ab1,	62	60	4079	5.48253
	mmu04510:Focal adhesion	7	0.0266	0.0653073	Rac2, Spp1, Lama3, Itgb3, Bad, Vtn, Tnxb,	62	192	4079	2.39861
	mmu00052:Galactose metabolism	3	0.0114	0.0775647	Lct, Akr1b3, Pfkp,	62	31	4079	6.36681

## Sheet: File 9B_functional_clusters
Additional file 9B - This sheet contains the functional clusters enriched for early, mid and late gene sets respectively.
	Classification is based on overlap between genes responding to 1 mM and 5 mM MAA treatment.
	Clusters	Enrichment score	Cluster gene count	Top term	Top term P_value	Other terms in the cluster	Genes in the cluster	No. of query genes present in all categories	No. of genes in the specific category out of all categories	No. of genes in all of the categories
Early	1	3.7	86	GO:0050794~regulation of cellular process	0.00613115	GO:0050789~regulation of biological process,GO:0065007~biological regulation,	Rasgef1b, Csdc2, Zfp786, Atr, Taok3, Iqgap2, Sox9, Drd4, Rasgrp2, Notch1, Zbtb40, Bach2, Tlr7, Arid5b, Baz2a, Dido1, Tigd5, Rassf5, Bcl2, EG434179, Zfp653, EG382421, Ticam1, Bnc2, Clpb, Rasa4, Suv420h1, Zbtb46, Homez, Nod2, Pias3, Nfkbie, Creb5, Garnl3, Klf5, Rgs16, Mapt, Casz1, Tnfsf11, Fgd6, Sphk1, Nsd1, Pmaip1, Socs2, Hbp1, Zfp318, Eaf2, Parp14, Epc2, Nr4a1, Egr2, Cd1d1, Egr1, Mzf1, Stim1, Tbx…	221	3816	14977
Mid	1	2.18	4	IPR003128:Villin headpiece	0.000142377	SM00153:VHP,domain:HP,	Ablim2, Ablim3, Vil1, Vill,	237	8	16924
Late	1	4.68	52	GO:0044421~extracellular region part	3.58648e-06	GO:0005576~extracellular region,GO:0005615~extracellular space,	Acvrl1, C1qtnf3, Enpp2, Pvrl1, Cxcl9, Angptl4, Cyp2f2, Ppy, Pdzk1ip1, Lsr, Hpse, Fstl1, Adamts16, 1810023F06Rik, Tnxb, Egfl7, Apod, Vtn, Dtna, Sgcd, Cldn1, Ecm2, Tnfsf10, Mfap5, Spp1, Gpha2, Lama3, Hs6st1, Pcdhb12, Fmo2, Prss35, Olfm1, Pcdhb13, H2-Q10, Cp, Rarres2, Loxl4, Cfd, Spink4, Wisp2, Lynx1, Alox5ap, Postn, 1700019N12Rik, Plac1, Nell2, Dnase1l3, Sparcl1, Prrg2, Mmp19, Agrn, Dmkn,	196	2195	15845
	2	2.24	3	IPR003924:Latrophilin receptor	0.00314669	GO:0016524~latrotoxin receptor activity,IPR003112:Olfactomedin-like,SM00284:OLF,	Olfm2, Olfml2a, Olfm1,	213	7	16924
	3	2	4	IPR003645:Follistatin-like, N-terminal	0.00657792	SM00274:FOLN,SM00280:KAZAL,	Sparcl1, Fstl1, Agrn, Spink4,	213	10	16924
